# Supplementary material
Source: Springer Nature journal article supplement (https://www.springermedizin.de/resource/supplementary/12955_2009_646_MOESM3_ESM.pdf/9560988)
Supplement: MOESM3 [file 9560988]

# ALZHEIMER'S DISEASE

- COMPETENCIES**
- Driving
  - Cooking
  - Counting/adding up money
  - Paying the bills

- Incompetence**
- Self perceived
  - Perception of others

- SYMPTOMS**
- Memory loss ● ▲ (◆)
  - Short term memory loss ●
  - Difficulties with word finding (●)
  - Disorientation ●
  - Easily distracted
  - Wandering
  - Unable to think quickly
  - Counting difficulties
  - Loss of thought ● ▲

- SIGNS**
- Cognitive decline ▲ ● (◆)
  - Memory impairment ● ▲
  - Visuospatial disability
  - Psychomotor retardation
  - Dysphasia

- INDIVIDUAL CHARACTERISTICS**
- Gender
  - Stage of Alzheimer's disease

- EXTERNAL FACTORS**
- Marital status
  - Residential status
  - Environment
  - Coping

- Physical Functioning ●**
- ◆ ◆ ▲ ▲ ■ ■  
Physical well being

- Role Functioning**
- Physical ● ■
  - Work ● ■ ◆

- Activities of Daily Living**
- Self care ◆ ■ ◆
  - Daily activities ◆ ■ ●
  - Hobbies ◆ ●
  - Finances

- Relationships**
- Children
  - Neighbours
  - Family
  - Partners
  - Friends

- Independence**
- Dependence (▲ ◆ ●)
  - Loss of independence
  - Loss of freedom

- Key:**
- = 15D
  - ◆ = EQ-5D
  - ◆ = HU12
  - ▲ = HU13
  - = SF-6D

- Self Image**
- Self concept
  - Self worth
  - Status /Role
  - Uselessness

- Mental Health**
- Mood ■ ●
  - Suicidal ideation ▲
  - Depression ● ◆ ▲ ■
  - Anxiety/worry ● ◆ ◆

- Emotional Functioning**
- Overwhelmed
  - Fear
  - Sadness ■ ● ▲
  - Despair
  - Bad tempered ◆
  - Frustration
  - Anger ◆
  - Disgust
  - Embarrassment
  - Shame

- Social Impact ■**
- Socialising
  - Withdrawal
  - Conversation/interaction (● ▲)
  - Social isolation
